# Supplementary material for: Metal tolerance of Río Tinto fungi
Source: Front Fungal Biol. 2024 Oct 16;5:1446674. doi: 10.3389/ffunb.2024.1446674 (PMC11521807; doi:10.3389/ffunb.2024.1446674)
Supplement: Supplementary file 5 [file Table2.xlsx]

## Sheet: Hoja1
	Table S2. Concentration of the main metal ions present in Río Tinto waters during the 2009-2011 campaign.
		Metal concentration (mg l-1) - 2009
	Sampling site	S	Fe	Ni	Cu	Co	As	Cd	Pb	Al
	M01	20132,3 ± 4174,1	23158,1 ± 2794,2	1,6 ± 0,2	21,2 ± 5,7	26,5 ± 7,2	11,0 ± 0,8	0,1 ± 0,0	0,0 ± 0,0	4487,9 ± 2745,2
	M02	1861,7 ± 340,5	716,4 ± 80,2	1,0 ± 0,3	0,3 ± 0,3	4,1 ± 1,2	0,0 ±0,0	0,0 ± 0,0	0,0 ± 0,0	61,8 ± 74,9
	M03	8929,6 ± 2378,9	8825 ± 1376,6	1,3 ± 0,2	11,7 ± 7,8	13,7 ± 2,7	5,4 ± 3,0	0,1 ± 0,0	0,0 ± 0,0	1435,6 ± 340,1
	M04	1100,6 ± 569,4	472,4 ± 273,4	0,8 ± 0,4	ND	3,1 ± 1,9	0,0 ± 0,0	0,0 ± 0,0	0,0 ± 0,0	1,7 ± 0,8
	M05	4617,9 ± 1259,8	5639,2 ± 1452,2	0,9 ± 0,4	3,3 ± 1,3	6,9 ± 3,3	1,5 ± 0,0	0,0 ± 0,0	0,0 ± 0,0	390,1 ± 229,3
	M06	16444,2 ± 4282,4	18673,8 ± 4892,1	1,3 ± 0,3	109,6 ± 39,2	20,3 ± 6,0	18,4 ± 3,8	0,4 ± 0,1	0,0 ± 0,0	4075,8 ± 2078,0
	M07	15470,3 ± 3291,8	21264,1 ± 5786,7	0,7 ± 0,5	87,2 ± 30,2	18,8 ± 3,7	29,6 ± 12,8	0,3 ± 0,1	0,1 ± 0,1	2099,0 ± 1438,5
	M08	5560,5 ± 1194,7	5411,3 ± 730,7	0,8 ± 0,2	47,8 ± 3,2	5,2 ± 0,9	6,5 ± 1,3	0,2 ± 0,0	0,0 ± 0,0	611,6 ± 116,1
	M09	15194,4 ± 4394,6	19315,5 ± 6483,1	1,1 ± 0,4	90,5 ± 30,5	17,8 ± 6,3	27,5 ± 10,6	0,5 ± 0,2	0,1 ± 0,0	1665,1 ± 776,8
	M10	919,6 ± 234,58	590,7 ± 52,7	0,0 ± 0,0	7,7 ± 0,5	0,7 ± 0,1	0,1 ± 0,0	0,1 ± 0,0	0,0 ± 0,0	73,1 ± 20,1
	M11	1489,5 ± 1080,8	1320,1 ± 594,2	0,6 ± 0,8	6,3 ± 1,8	1,5 ± 0,8	0,1 ± 0,1	0,2 ± 0,1	0,2 ± 0,2	158,3 ± 111,4
	M12	2054,7 ± 565,5	1580,6 ± 350,0	0,8 ± 0,6	38,1 ± 43,3	3,1 ± 0,6	0,2 ± 0,2	0,4 ± 0,1	0,1 ± 0,1	192,4 ± 78,1
	M13	2577,0 ± 1181,3	2418,1 ± 829,4	0,4 ± 0,2	22,0 ± 9,9	2,9 ± 1,3	2,4 ± 1,2	0,5 ± 0,2	0,5 ± 0,2	187,0 ± 63,5
	M14	3941,3 ± 1175,8	1200,0 ± 10887,6	2,0 ± 1,0	308,5 ± 50,4	5,7 ± 2,4	1,4 ± 1,2	1,6 ± 0,0	0,0 ± 0,0	817,9 ± 744,2
	M15	5274,1 ± 1162,3	6814,1 ± 657,9	1,0 ± 0,5	407,6 ± 29,0	3,4 ± 1,4	14,8 ± 4,0	1,7 ± 1,1	0,0 ± 0,0	577,5 ± 523,0
	M16	3599,1 ± 1108,2	2036,8 ± 523,4	1,6 ± 0,5	235,4 ± 80,0	4,7 ± 0,8	2,7 ± 1,1	0,9 ± 0,2	0,0 ± 0,0	775,7 ± 131,3
	M18	3474,3 ± 1496,8	2260,4 ± 602,9	1,1 ± 0,1	154,3 ± 8,9	3,5 ± 0,5	4,0 ± 0,6	0,7 ± 0,2	0,2 ± 0,0	310,3 ± 274,4
	M19	1840,3 ± 1226,4	1133,8 ± 728,3	0,6 ± 0,4	89,9 ± 51,6	2,1 ± 1,2	1,2 ± 1,0	0,4 ± 0,2	0,0 ± 0,0	264,9 ± 155,1
	M21	1136,0 ± 908,1	560,8 ± 439,9	0,4 ± 0,3	48,5 ± 24,8	1,4 ± 0,9	0,8 ± 1,2	0,2 ± 0,1	0,1 ± 0,1	182,1 ± 132,3
		Metal concentration (mg l-1) - 2009
		S	Fe	Ni	Cu	Co	As	Cd	Pb	Al
	Average 2009	6085,11 ± 1685,6	6494,3 ± 2080,8	0,9 ± 0,4	93,9 ± 23,2	7,6 ± 2,3	6,7 ± 2,3	0,4 ± 0,1	0,1 ± 0,0	966,7 ± 1305,4
		Metal concentration (mg l-1) - 2010
	Sampling site	S	Fe	Ni	Cu	Co	As	Cd	Pb	Al
	M01	6965,6 ± 270,9	11615,5 ± 4228,6	0,7 ± 0,2	8,2 ± 3,4	14,6 ± 6,2	15,6 ± 9,0	0,1 ± 0,0	0,0 ± 0,0	1691,2 ± 806,9
	M02	2569 ± 238,7	1114,0 ± 159,8	0,6 ± 0,5	0,5 ± 0,0	2,5 ± 1,9	0,5 ± 0,4	0,0 ± 0,0	0,0 ± 0,0	177,2 ± 196,6
	M03	3644,3 ± 2357	5577,9 ± 4284,6	1,1 ± 1,1	4,3 ± 3,2	7,4 ± 5,7	7,0 ± 6,3	0,0 ± 0,0	0,0 ± 0,0	706,1 ± 541,1
	M04	1081,7 ± 214,9	405,3 ± 440,8	0,5 ± 0,4	0,0 ± 0,0	2,2 ± 1,8	0,3 ± 0,3	0,0 ± 0,0	0,0 ± 0,0	2,2 ± 2,5
	M05	2121,0 ± 1240,3	1391,3 ± 440,6	0,8 ± 0,0	2,8 ± 2,4	5,9 ± 2,0	4,7 ± 5,4	0,0 ± 0,0	0,0 ± 0,0	493,9 ± 646,4
	M06	6739,6 ± 779,9	12571,6 ± 1000,0	1,2 ± 0,7	113,7 ± 12,1	16,7 ± 2,7	28,1 ± 7,3	0,6 ± 0,1	0,1 ± 0,1	2844,3 ± 363,0
	M07	8923,4 ± 767,5	14290,3 ± 3824,4	0,4 ± 0,1	67,4 ± 14,6	14,6 ± 2,2	35,0 ± 14,0	0,2 ± 0,0	0,1 ± 0,1	1525,5 ± 381,4
	M08	3780,5 ± 189,7	3611,8 ± 623,1	0,8 ± 0,1	34,8 ± 7,2	4,6 ± 1,5	8,7 ± 3,7	0,2 ± 0,1	0,0 ± 0,0	457,8 ± 162,2
	M09	5924,8 ± 1310,3	10343,4 ± 4186,0	0,7 ± 0,3	48,7 ± 19,1	11,5 ± 2,2	24,2 ± 16,0	0,3 ± 0,2	0,2 ± 0,1	1225,4 ± 593,0
	M10	867,8 ± 73,1	427,0 ± 26,5	0,0 ± 0,0	5,8 ± 0,3	0,7 ± 0,0	0,4 ± 0,2	0,1 ± 0,0	0,1 ± 0,0	68,1 ± 8,1
	M11	1566,0 ± 117,1	961,9 ± 99,0	0,1 ± 0,0	10,0 ± 4,9	1,1 ± 0,1	1,1 ± 0,4	0,3 ± 0,1	0,2 ± 0,1	218,0 ± 132,7
	M12	1675,8 ± 294,2	1180,3 ± 77,7	0,2 ± 0,2	14,9 ± 0,8	1,7 ± 0,6	1,8 ± 0,3	0,3 ± 0,2	0,1 ± 0,0	225,1 ± 133,9
	M13	1554,1 ± 680,2	775,2 ± 463,5	0,1 ± 0,1	11,3 ± 6,1	1,0 ± 0,5	1,5 ± 1,1	0,2 ± 0,1	0,3 ± 0,1	150,0 ± 124,1
	M14	3381,7 ± 1392,5	963,2 ± 227,3	1 ± 0,5	224,1 ± 84,0	4,5 ± 1,6	2,3 ± 1,1	0,8 ± 0,3	0,0 ± 0,0	1280,8 ± 886,9
	M15	4877,6 ± 1266,5	4975,7 ± 826,2	2,4 ± 1,2	346,4 ± 74,5	3,6 ± 1,1	23,6 ± 4,3	1,4 ± 0,0	0,1 ± 0,0	801,4 ± 36,6
	M16	3083,7 ± 1569,3	1190,3 ± 472,9	1,2 ± 1,0	166,6 ± 100,6	3,3 ± 1,4	4,0 ± 2,0	0,7 ± 0,2	0,1 ± 0,1	845,3 ± 535,9
	M18	2923,9 ± 509,8	1573,4 ± 206,3	1 ± 0,3	150,2 ± 39,6	4,2 ± 1,4	7,0 ± 1,3	0,8 ± 0,3	0,2 ± 0,2	877,1 ± 380,4
	M19	1026,9 ± 1042,5	409,7 ± 460,4	0,3 ± 0,4	46,0 ± 54,1	1,3 ± 1,5	1,2 ± 1,5	0,2 ± 0,3	0,3 ± 0,2	231,8 ± 193,2
	M21	563,9 ± 340,1	178,1 ± 127,0	0,2 ± 0,1	22,1 ± 15,3	0,6 ± 0,5	0,2 ± 0,1	0,1 ± 0,1	0,3 ± 0,0	134,0 ± 120,4
		Metal concentration (mg l-1) - 2010
		S	Fe	Ni	Cu	Co	As	Cd	Pb	Al
	Average 2010	3330,1 ± 771,3	3871,4 ± 1167,1	0,7 ± 0,4	67,3 ± 23,3	5,4 ± 1,8	8,8 ± 3,9	0,3 ± 0,1	0,1 ± 0,1	734,5 ± 271,4
		Metal concentration (mg l-1) - 2011
	Sampling site	S	Fe	Ni	Cu	Co	As	Cd	Pb	Al
	M01	6587.29	7057.42	1.17446	4.882	10.5569	3.54953	0.049209	0.039104	938.6
	M02	175.694	25.57	0.066832	0.37	0.207467	0.000811	0.003452	0.014762	26.5
	M03	1502.18	1102.43	0.47565	1.101	1.45155	0.410904	0.008802	0.018403	156.4
	M04	74.24	11.42	0.030574	0.014	0.125172	0.001736	0.000515	0.000168	0.2
	M05	613.33	310.656	0.075907	0.577	0.630532	0.100332	0.006326	0.015375	59.4
	M06	5635.51	7298.1	0.512004	57.125	11.211	8.97062	0.286456	0.047318	1540.2
	M07	5536.68	5951.56	0.229953	33.141	7.57565	8.29411	0.110502	0.132557	754
	M08	1986.77	1615.85	0.348312	17.745	2.28034	2.11132	0.106081	0.047263	275.4
	M09	3833.94	3913.25	0.301576	21.649	5.35536	4.49225	0.119506	0.141645	507.9
	M10	856.758	414.737	0.05356	5.31	0.601475	0.043028	0.035672	0.041588	63.3
	M11	1326.47	984.001	0.048243	11.72	1.27786	0.549578	0.253249	0.239399	127.7
	M12	1274.42	930.74	0.063654	13.48	1.30953	1.03841	0.251967	0.321548	138
	M13	1096.47	595.996	0	10.204	0	0	0	0	0
	M14	1802.76	466.091	0.415908	84.197	2.1155	1.08717	0.322174	0.041052	448.7
	M15	4907.16	5071.69	0.845309	354.795	2.48801	13.3529	1.30071	0.036532	901.3
	M16	1241.6	436.962	0.311993	53.63	1.30166	1.09155	0.23934	0.109023	254.56
	M18	1937.42	811.384	0.688147	82.411	2.0857	2.46068	0.433627	0.414564	352.2
	M19	108.085	34.297	0.028967	4.499	0.098354	0.003143	0.014632	0.154405	15
	M21	79.13	22.929	0.022752	2.826	0.072761	0.004914	0.011098	0.148512	10.5
		Metal concentration (mg l-1) - 2011
		S	Fe	Ni	Cu	Co	As	Cd	Pb	Al
	Average 2011	2135,6 ± 2087,4	1950,3 ± 2523,4	0,3 ± 0,3	40,0 ± 80,9	2,7 ± 3,5	2,5 ± 3,8	0,2 ± 0,3	0,1 ± 0,1	345,8 ± 418,6
	Sampling site	Total Metal concentration (mg l-1) [2009, 2010, 2011]
		S	Fe	Ni	Cu	Co	As	Cd	Pb	Al
	M01	11228,4 ± 7713,3	13943,7 ± 8299,0	1,2 ± 0,5	11,4 ± 8,6	17,2 ± 8,3	10,0 ± 6,1	0,1 ± 0,0	0,0 ± 0,0	2372,6 ± 1870,2
	M02	1535,5 ± 1229,6	618,7 ± 550,8	0,6 ± 0,5	0,4 ± 0,1	2,3 ± 2,0	0,2 ± 0,3	0,0 ± 0,0	0,0 ± 0,0	88,5 ± 78,8
	M03	4692,0 ± 3822,9	5168,4 ± 3877,5	1,0 ± 0,4	5,7 ± 5,4	7,5 ± 6,1	4,3 ± 3,4	0,0 ± 0,1	0,0 ± 0,0	766,0 ± 641,7
	M04	752,2 ± 587,2	296,4 ± 249,0	0,4 ± 0,4	0,0 ± 0,0	1,8 ± 1,5	0,1 ± 0,2	0,0 ± 0,0	0,0 ± 0,0	1,4 ± 1,0
	M05	2450,7 ± 2022,5	2447,1 ± 2816,8	0,6 ± 0,4	2,2 ± 1,4	4,5 ± 3,4	2,1 ± 2,4	0,0 ± 0,0	0,0 ± 0,0	314,5 ± 226,9
	M06	9606,4 ± 5947,4	12847,8 ± 5692,9	1,0 ± 0,4	93,5 ± 31,5	16,1 ± 4,6	18,5 ± 9,6	0,4 ± 0,2	0,0 ± 0,1	2820,1 ± 1268,0
	M07	9976,8 ± 5049,9	13835,3 ± 7666,4	0,4 ± 0,2	62,6 ± 27,3	13,7 ± 5,7	24,3 ± 14,1	0,2 ± 0,1	0,1 ± 0,0	1459,5 ± 674,9
	M08	3775,9 ± 1786,9	3546,3 ± 1898,6	0,6 ± 0,3	33,4 ± 15,1	4,0 ± 1,5	5,8 ± 3,4	0,2 ± 0,1	0,0 ± 0,0	448,3 ± 168,3
	M09	8317,7 ± 6046,4	11190,7 ± 7736,0	0,7 ± 0,4	53,6 ± 34,7	11,6 ± 6,2	18,7 ± 12,4	0,3 ± 0,2	0,1 ± 0,1	1132,8 ± 584,1
	M10	881,4 ± 33,6	477,5 ± 98,2	0,0 ± 0,0	6,3 ± 1,3	0,7 ± 0,1	0,2 ± 0,2	0,1 ± 0,0	0,0 ± 0,1	68,1 ± 4,9
	M11	1460,7 ± 122,3	1088,7 ± 200,7	0,2 ± 0,3	9,3 ± 2,8	1,3 ± 0,2	0,6 ± 0,5	0,3 ± 0,1	0,2 ± 0,0	168,0 ± 45,9
	M12	1668,3 ± 390,2	1230,5 ± 327,8	0,4 ± 0,4	22,2 ± 13,8	2,0 ± 0,9	1,0 ± 0,9	0,3 ± 0,1	0,2 ± 0,1	185,2 ± 44,0
	M13	1742,5 ± 758,0	1263,1 ± 1004,3	0,2 ± 0,2	14,5 ± 6,5	1,3 ± 1,5	1,3 ± 1,2	0,2 ± 0,3	0,3 ± 0,3	168,5 ± 99,0
	M14	3041,9 ± 1109,0	876,4 ± 374,6	1,1 ± 0,8	205,6 ± 113,3	4,1 ± 1,8	1,6 ± 0,6	0,9 ± 0,6	0,0 ± 0,0	849,1 ± 416,9
	M15	5019,6 ± 220,9	5620,5 ± 1034,8	1,4 ± 0,9	369,6 ± 33,2	3,2 ± 0,6	17,3 ± 5,5	1,5 ± 0,2	0,0 ± 0,1	760,1 ± 165,8
	M16	2641,5 ± 1239,4	1221,4 ± 800,4	1,0 ± 0,7	151,9 ± 91,8	3,1 ± 1,7	2,6 ± 1,5	0,6 ± 0,3	0,1 ± 0,1	625,2 ± 322,9
	M18	2778,5 ± 778,7	1548,4 ± 724,8	0,9 ± 0,2	129,0 ± 40,4	3,3 ± 1,1	4,5 ± 2,3	0,6 ± 0,2	0,3 ± 0,1	593,7 ± 315,8
	M19	991,8 ± 866,6	525,9 ± 558,9	0,3 ± 0,3	46,8 ± 42,7	1,2 ± 1,0	0,8 ± 0,7	0,2 ± 0,2	0,2 ± 0,2	170,5 ± 135,8
	M21	593,0 ± 529,0	253,9 ± 276,8	0,2 ± 0,2	24,5 ± 22,9	0,7 ± 0,7	0,3 ± 0,4	0,1 ± 0,1	0,2 ± 0,1	108,9 ± 88,5
			Total Metal concentration (mg l-1) [2009, 2010, 2011]
		S	Fe	Ni	Cu	Co	As	Cd	Pb	Al
	Total average value	3850,3 ± 4228,4	4105,3 ± 5716,4	0,6 ± 0,5	66,6 ± 97,6	5,2 ± 6,0	6,0 ± 8,8	0,3 ± 0,4	0,1 ± 0,1	694,5 ± 916,5
